# Supplementary material
Source: PubMed Central journal article supplement (PMC4308424)
Supplement: NIHMS643292-supplement-Supplemental_Table_.pdf [file NIHMS643292-supplement-Supplemental_Table_.pdf]

## Supplemental Material

Supplemental Table I. Description of heart lesions, procedures and treatment in cases and controls with congenital heart disease.

| Case            | Heart lesion                              | Total surgeries | Procedure in prior 2 weeks*       | Medical history                            | Stroke type | Antiplatelet or Anticoagulation |          |
|-----------------|-------------------------------------------|-----------------|-----------------------------------|--------------------------------------------|-------------|---------------------------------|----------|
|                 |                                           |                 |                                   |                                            |             | Before*                         | After    |
| 1               | Aortic stenosis                           | 3               | none                              | St. Jude valve                             | hemorrhagic | coumadin                        | coumadin |
| 2               | ASD                                       | 0               | none                              | Low protein C, protein S, antithrombin III | ischemic    | none                            | LMWH     |
| 3               | ASD                                       | 0               | none                              | Trisomy 21, recent URI                     | ischemic    | none                            | LMWH     |
| 4               | ASD                                       | 0               | none                              |                                            | ischemic    | none                            | aspirin  |
| 5               | Atrioventricular canal                    | 1               | ASD closure, MV repair            |                                            | ischemic    | none                            | none     |
| 6               | Atrioventricular canal                    | 2               | none                              | Trisomy 21                                 | hemorrhagic | none                            | none     |
| 7               | Coarctation of the aorta, ASD, VSD        | 1               | cardiac catheterization           |                                            | hemorrhagic | none                            | none     |
| 8               | Hypoplastic left heart syndrome           | 1               | none                              | recent URI                                 | ischemic    | aspirin                         | aspirin  |
| 9               | Partial anomalous pulmonary venous return | 1               | endovascular ASD closure          |                                            | hemorrhagic | none                            | none     |
| 10              | Hypoplastic right ventricle, PS           | 2               | none                              |                                            | ischemic    | none                            | aspirin  |
| 11              | Severe aortic coarctation                 | 2               | mitral valve replacement          | congestive heart failure                   | ischemic    | none                            | coumadin |
| 12              | Transposition of the great arteries       | 7               | VSD closure, RV to PA conduit     | cardiac arrest, VAD                        | ischemic    | none                            | aspirin  |
| 13              | Transposition of the great arteries       | 5               | none                              | BAS                                        | ischemic    | aspirin                         | coumadin |
| 14              | Transposition of the great arteries       | 2               | bidirectional cavopulmonary shunt | BAS (remote)                               | ischemic    | aspirin                         | aspirin  |
| 15              | Truncus arteriosus                        | 3               | AV repair                         |                                            | ischemic    | none                            | none     |
| <b>Controls</b> |                                           |                 |                                   |                                            |             |                                 |          |
| 1               | Hypoplastic left heart syndrome           | 2               | none                              | cardiac arrest, died                       |             | none                            | none     |
| 2               | Critical PS                               | 4               | none                              | valve repair                               |             | aspirin                         | aspirin  |
| 3               | PS                                        | 0               | none                              |                                            |             | none                            | none     |
| 4               | PS, ASD                                   | 1               | none                              | pulmonic valvulotomy                       |             | none                            | none     |
| 5               | Tetralogy of Fallot                       | 1               | none                              |                                            |             | none                            | none     |
| 6               | VSD                                       | 0               | none                              |                                            |             | none                            | none     |
| 7               | VSD                                       | 0               | none                              |                                            |             | none                            | none     |

\*time of stroke or index date for controls; Abbreviations: ASD = atrial septal defect, AV = aortic valve, BAS = balloon atrial septostomy, LMWH = low molecular weight heparin, MV = mitral valve, PA = pulmonary artery, PS = Pulmonary stenosis, RV = right Ventricle, VAD = ventricular assist device, VSD = ventricular septal defect
